# Supplementary material for: The 1–31-Day Predictions of the South China Sea Summer Monsoon in the CAMS-CSM Climate Forecast System
Source: MDPI journal article supplement (doi:10.3390/atmos13071051), 2022-06-30
Supplement: s1 [file s1]

Archive with 1 entries (1 files):
- atmosphere-1750085-supplementary.pdf
